# Supplementary material for: Preparation of Red Ginseng Marc-Derived Gintonin and Its Application as a Skin Nutrient
Source: MDPI journal article supplement (doi:10.3390/nu15112574), 2023-05-31
Supplement: s1 [file s1]

# *Nutrients*

## Supplementary Material

### Preparation of red ginseng marc-derived gintonin and its application as a skin nutrient

Rami Lee <sup>1</sup>, Ji-Hun Kim <sup>1</sup>, Hongik Hwang <sup>2</sup>, Hyewhon Rhim <sup>3</sup>, Sung-Hee Hwang <sup>4</sup>, Ik-Hyun Cho <sup>5</sup>, Do-Geun Kim <sup>6</sup>, Hyoung-Chun Kim <sup>7</sup> and Seung-Yeol Nah <sup>1,\*</sup>

<sup>1</sup> Ginsentology Research Laboratory and Department of Physiology, College of Veterinary Medicine, Konkuk University, Seoul 05029, Republic of Korea; rmlee12@konkuk.ac.kr (R.L.); bioskjh@naver.com (J.-H.K.)

<sup>2</sup> Department of Life Science, University of Seoul, Seoul 02504, Republic of Korea; hongik@uos.ac.kr

<sup>3</sup> Center for Neuroscience, Korea Institute of Science and Technology, Seoul 02792, Republic of Korea; hrhim@kist.re.kr

<sup>4</sup> Department of Pharmaceutical Engineering, College of Health Sciences, Sangji University, Wonju 26339, Republic of Korea; sunghhwang@sangji.ac.kr

<sup>5</sup> Department of Convergence Korean Medical Science, College of Korean Medicine, Kyung Hee University, Seoul, 02447, Republic of Korea; ihcho@khu.ac.kr

<sup>6</sup> Korea Brain Research Institute (KBRI), 61, Cheomdan-ro, Dong-gu, Daegu, 41062, Republic of Korea; kimvet0911@kbri.re.kr

<sup>7</sup> Neuropsychopharmacology and Toxicology Program, College of Pharmacy, Kangwon National University, Chunchon 24341, Republic of Korea; kimhc@kangwon.ac.kr

\*Correspondence: synah@konkuk.ac.kr; Tel.: +82-2-450-4154

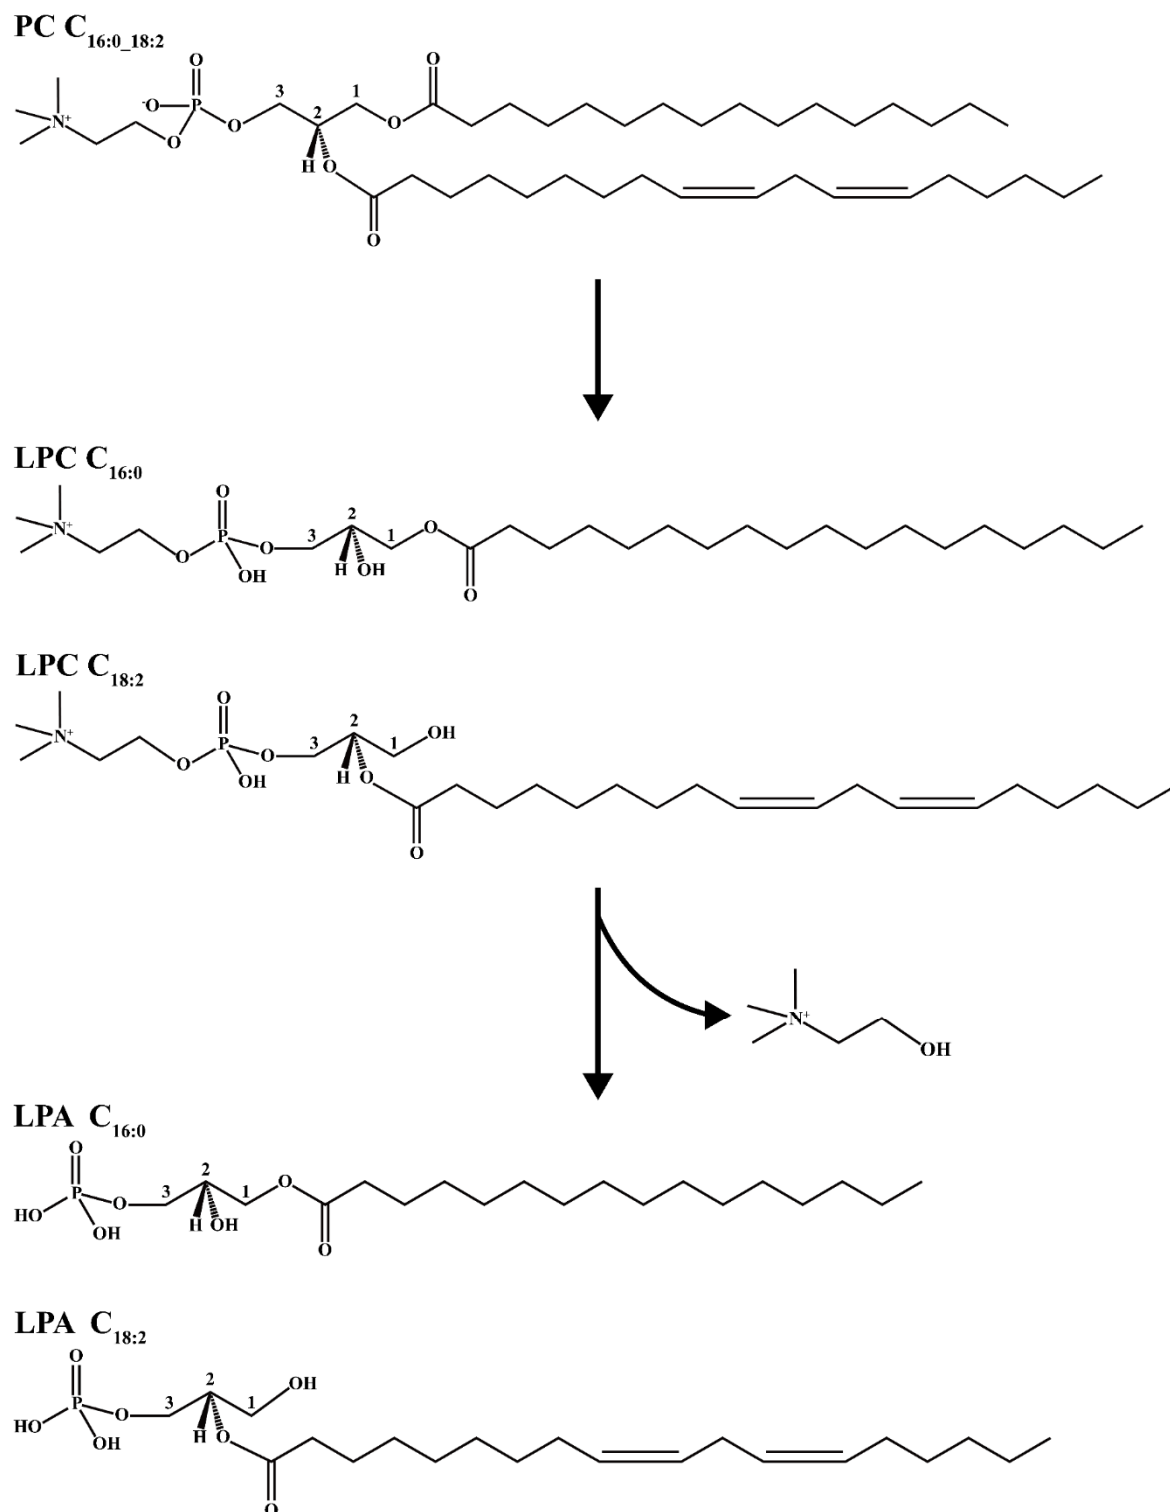

**Figure S1.**

A possible process for the lysophosphatidic acids (LPAs) formation from phospholipids such as phosphatidic acid (PA) or phosphatidylcholine (PC) in KRGM gintonin.
